# Supplementary material for: Association of ABO Blood Type with Infection and Severity of COVID-19 in Inpatient and Longitudinal Cohorts
Source: Preprints.org preprint supplement (doi:10.20944/preprints202308.0881.v1), 2023-08-11
Supplement: Supplementary file 1 [file supplementary]

## Author statements

Please insert the relevant text under the subheadings below. A completed form must be signed by all authors. Please note that we only accept hand-signed signatures. Please upload the signed copy with your submission, otherwise we will not process your manuscript further.

**Manuscript title:** Association of ABO blood type with infection and severity of COVID-19 in inpatient and longitudinal cohorts

**Authors:** Eatz, Tiffany, BS, BA, Mantero, Alejandro Max Antonio, PhD, Williams, Erin, BS, MSBE, Cash, Charles J, BS, Perez, Nathalie, BS, Cromar, Zachary J, BS, Hernandez, Adiel, MD, Cordova, Matthew, MD, Godbole, Neha, BS, Le, Anh, BS, Lin, Rachel, BS, Luo, Sherry, BS, BA, Patel, Anmol, BS, Yaa, Abu, BA, Pallikkuth, Suresh, PhD, Pahwa, Savita, MD

**Corresponding author:**

Tiffany Eatz

**Article type:** (Original) article

If your manuscript contains information related to human or animal use, please clearly state:

1. Does your study need ethic approval?

Yes ☒

No ☐ If no, please state the reason:

2. If ethic approval is needed, do you have an ethic approval number?

Yes ☒ , please enter ethic approval number here: IRB #20210025 and #20201026

No ☐ If no, please provide scanned copy of ethic approval files

**Authors' contributions**

We follow International Committee of Medical Journal Editors (ICMJE) recommendation of authorship, which is based on the following 4 criteria:

1. Substantial contributions to the conception or design of the work; or the acquisition, analysis, or interpretation of data for the work; AND
2. Drafting the work or revising it critically for important intellectual content; AND
3. Final approval of the version to be published; AND
4. Agreement to be accountable for all aspects of the work in ensuring that questions related to the accuracy or integrity of any part of the work are appropriately investigated and resolved.

All those designated as authors should meet all four criteria for authorship, and all who meet the four criteria should be identified as authors. Those who do not meet all four criteria should be acknowledged. Please insert here the contribution each author made to the manuscript—e.g., literature search, figures, study design, data collection, data analysis, data interpretation, writing etc. If all authors contributed equally, please state this. The information provided here must match the contributors' statement in the manuscript.

**Author Contributions:** All authors meet the four criteria for ICMJE authorship, which include (1) substantial contributions to the conception or design of the work, or the acquisition, analysis, or interpretation of data for the work, (2) drafting the work or revising it critically for important intellectual content, (3) final approval of the version to be published, and (4) agreement to be accountable for all aspects of the work in ensuring that questions related to the accuracy or integrity of any part of the work are appropriately investigated and resolved. Conceptualization, Tiffany Eatz; Data curation, Tiffany Eatz, Charles Cash, Nathalie Perez, Zachary Cromar, Adiel Hernandez, Matthew Cordova, Neha Godbole, Le Anh, Rachel Lin, Sherry Luo, Anmol Patel, Yaa Abu and Savita Pahwa; Formal analysis, Tiffany Eatz, Alejandro Mantero and Erin Williams; Funding acquisition, Suresh Pallikkuth and Savita Pahwa; Investigation, Tiffany Eatz, Erin Williams, Charles Cash, Nathalie Perez, Zachary Cromar, Adiel Hernandez, Matthew Cordova, Neha Godbole, Le Anh, Rachel Lin, Anmol Patel, Yaa Abu, Suresh Pallikkuth and Savita Pahwa; Methodology, Tiffany Eatz, Alejandro Mantero, Erin Williams, Suresh Pallikkuth and Savita Pahwa; Project administration, Tiffany Eatz and Savita Pahwa; Resources, Tiffany Eatz, Sherry Luo, Suresh Pallikkuth and Savita Pahwa; Software, Alejandro Mantero and Erin Williams; Supervision, Tiffany Eatz and Savita Pahwa; Validation, Alejandro Mantero, Erin Williams and Savita Pahwa; Visualization, Tiffany Eatz; Writing – original draft, Tiffany Eatz; Writing – review & editing, Tiffany Eatz, Alejandro Mantero, Erin Williams, Charles Cash, Nathalie Perez, Zachary Cromar, Adiel Hernandez, Matthew Cordova, Neha Godbole, Le Anh, Rachel Lin, Sherry Luo, Anmol Patel, Yaa Abu, Suresh Pallikkuth and Savita Pahwa.

## Conflicts of interest

Please insert here: 1. authors' conflicts of interest; 2. sources of support for the work, including sponsor names along with explanations of the role of those sources if any in study design; collection, analysis, and interpretation of data; writing of the report; 3. the decision to submit the report for publication; or a statement declaring that the supporting source had no such involvement, etc.

1. COI: none
2. The retrospective chart review received no specific grant from any funding agency in the public, commercial, or not-for-profit sectors. The longitudinal prospective portion of this study is part of the PARIS /SPARTA studies funded by the NIAID Collaborative Influenza Vaccine Innovation Centers (CIVIC) contract 75N93019C00051 (PI F Krammer) with SGP as PI of the University of Miami site. Also supported by Miami Center for AIDS Research (CFAR) laboratory sciences core at the University of Miami Miller School of Medicine funded by a grant (P30AI073961) to SP from the NIH, which is supported by the following NIH Co-Funding and Participating Institutes and Centers: NIAID, NCI, NICHD, NHLBI, NIDA, NIMH, NIA, NIDDK, NIGMS, FIC, and OAR.
3. All authors agreed on submission of the manuscript to the journal, *COVID*. Funding administration was not involved in this process.

I agree with: the plan to submit/publish to **COVID**; the contents of the manuscript; to being listed as an author; and to the conflicts of interest statement as summarised. I have had access to all the data in the study (for original research articles) and accept responsibility for its validity.

|                                               |                        |                                                                                                                   |
|-----------------------------------------------|------------------------|-------------------------------------------------------------------------------------------------------------------|
| Title and name: Tiffany Eatz                  | Highest degree: BS, BA | Signature:  Date: 08/01/2023   |
| Title and name: Alejandro Max Antonio Mantero | Highest degree: PhD    | Signature:  Date: 08/1/2023    |
| Title and name: Erin Williams                 | Highest degree: MSBE   | Signature:  Date: 8/01/2023    |
| Title and name: Charles J Cash                | Highest degree: BS     | Signature:  Date: 08/01/23     |
| Title and name: Nathalie Perez                | Highest degree: BS     | Signature:  Date: 8/1/23       |
| Title and name: Zachary J Cromar              | Highest degree: BS     | Signature:  Date: 8/2/2023     |
| Title and name: Adiel Hernandez               | Highest degree: MD     | Signature:  Date: 08/06/23     |
| Title and name: Matthew Cordova               | Highest degree: MD     | Signature:  Date: 08/02/23     |
| Title and name: Neha Godbole                  | Highest degree: BS     | Signature:  Date: 8/01/2023    |
| Title and name: Anh Le                        | Highest degree: BS     | Signature:  Date: 8/1/23      |
| Title and name: Rachel Lin                    | Highest degree: BS     | Signature:  Date: 8/1/23     |
| Title and name: Sherry Luo                    | Highest degree: BS     | Signature:  Date: 8/1/2023   |
| Title and name: Anmol Patel                   | Highest degree: BS     | Signature:  Date: 8/1/23     |
| Title and name: Yaa Abu                       | Highest degree: BS     | Signature:  Date: 08/01/23   |
| Title and name: Suresh Pallikkuth             | Highest degree: PhD    | Signature:  Date: 08/01/2023 |
| Title and name: Savita Pahwa                  | Highest degree: MD     | Signature:  Date: 8/1/2023   |

#### Corresponding author declaration

I 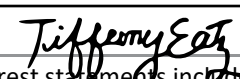 the corresponding author of this manuscript, certify that the contributors' and conflicts of interest statements included in this paper are correct and have been approved by all co-authors.
